# Supplementary material for: Direct analysis of lanthanides by ICPMS in calcium-rich water samples using a modular high-efficiency sample introduction system–membrane desolvator
Source: Royal Society of Chemistry journal article supplement (doi:10.1039/c3ja50070e), 2013-01-01
Supplement: c3ja50070e.pdf [file c3ja50070e.pdf]

| REE | VIDAC18                |                |                    | SERMIN1                |                |                    | POTRERO        |                    |
|-----|------------------------|----------------|--------------------|------------------------|----------------|--------------------|----------------|--------------------|
|     | Expected <sup>27</sup> | Agilent 7500ce | Thermo X-series II | Expected <sup>27</sup> | Agilent 7500ce | Thermo X-series II | Agilent 7500ce | Thermo X-series II |
| La  | 41±6.3                 | 78.7±33.6      | 31.7±20.6          | 261±6.5                | 253.4±9.8      | 232.0±24.8         | 332.8±22.8     | 384.0±20.8         |
| Ce  | 81±12.6                | 84.0±11.5      | 58.4±6.6           | 104±3.5                | 93.4±10.7      | 101.5±8.9          | 530.7±49.5     | 803.0±94.9         |
| Pr  | 12±1.9                 | 12.2±2.1       | 13.4±0.8           | 135±4.6                | 132.7±3.2      | 124.8±8.8          | 86.9±1.9       | 102.7±4.0          |
| Nd  | 62±10.6                | 61.7±5.3       | 52.8±10.8          | 744±20.6               | 752.4±11.7     | 650.1±70.3         | 382.8±8.6      | 330.0±79.2         |
| Sm  | 25±3.4                 | 28.4±4.0       | 23.9±1.6           | 177±5.7                | 177.8±12.0     | 161.9±11.9         | 85.5±1.7       | 85.5±13.7          |
| Eu  | 34±16                  | 5.9±1.1        | 3.2±0.2            | 35±1.1                 | 35.1±1.6       | 32.4±3.1           | 17.9±0.2       | 19.8±0.7           |
| Gd  | 48±6.3                 | 49.8±3.9       | 43.7±6.7           | 162±5.9                | 166.4±4.3      | 154.4±11.9         | 96.7±3.5       | 93.6±1.5           |
| Tb  | 11±1.5                 | 10.9±1.2       | 12.8±0.6           | 19±0.7                 | 16.6±2.4       | 17.1±1.7           | 13.7±0.2       | 13.6±0.3           |
| Dy  | 110±14                 | 106.1±8.6      | 87.0±5.5           | 88±3.4                 | 88.2±5.4       | 73.1±11.6          | 84.7±0.8       | 81.2±2.9           |
| Ho  | 31±3.8                 | 29.0±3.0       | 27.0±0.6           | 15±0.7                 | 13.8±2.8       | 13.9±1.9           | 17.1±0.5       | 15.6±0.5           |
| Er  | 117±15                 | 107.1±6.4      | 91.8±11.7          | 39±1.1                 | 36.4±0.8       | 33.0±2.6           | 49.0±1.5       | 44.2±2.7           |
| Tm  | 19±2.2                 | 18.4±1.2       | 19.0±0.8           | 4.8±0.33               | 5.2±2.0        | 4.3±0.7            | 6.5±0.6        | 6.0±0.1            |
| Yb  | 138±15                 | 142.0±2.0      | 111.6±4.7          | 29±1.2                 | 29.7±5.5       | 25.2±3.0           | 44.6±1.6       | 40.3±4.7           |
| Lu  | 23±2.8                 | 22.0±0.9       | 20.2±1.0           | 4.3±0.38               | 3.4±1.0        | 3.8±0.2            | 6.5±0.5        | 5.8±0.3            |

Table 1. REE concentrations (pg/g) obtained in this study using the Apex+Spiro+N<sub>2</sub> coupled to the Agilent 7500ce and the Thermo X-series II for VIDAC18, SERMIN1 and POTRERO; and the robust compositions reported by Santos et al. 2008 for VIDAC18 and SERMIN1.
